# Supplementary material
Source: HighWire-hosted journal article supplement (http://ajnr-stage2.highwire.org/highwire/filestream/96915/field_highwire_adjunct_files/0/1153.pdf)
Supplement: 1153.pdf [file 1153.pdf]

## A Normalized

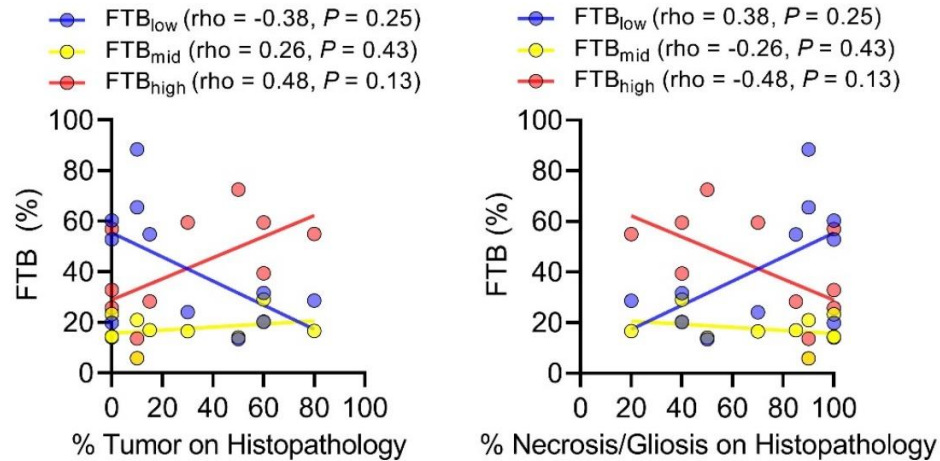

## B Standardized

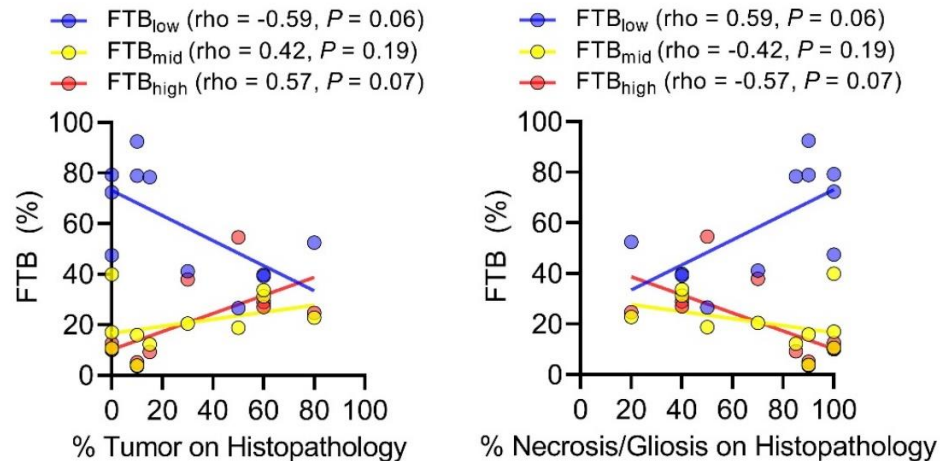

**Online Figure 1. Correlation between percent tumor and necrosis/gliosis evaluated on histopathology, versus FTB, between RN and tumor groups.** (A) FTB classes (FTB<sub>low</sub>, FTB<sub>mid</sub>, and FTB<sub>high</sub>) generated using normalized RCBV (nRCBV) threshold values of 1 and 1.75 plotted against percent tumor and percent necrosis/gliosis. (B) FTB classes (FTB<sub>low</sub>, FTB<sub>mid</sub>, and FTB<sub>high</sub>) generated using standardized RCBV (sRCBV) threshold values of 1 and 1.75 plotted against percent tumor and percent necrosis/gliosis. Spearman's rank correlation coefficient (rho) and *P* value provided in each panel.
